# Supplementary material for: Randomized Trial on the Effects of a Group EMDR Intervention on Narrative Complexity and Specificity of Autobiographical Memories: A Path Analytic and Supervised Machine-Learning Study
Source: Int J Environ Res Public Health. 2022 Jun 23;19(13):7684. doi: 10.3390/ijerph19137684 (PMC9265795; doi:10.3390/ijerph19137684)
Supplement: Supplementary file 1 [file ijerph-19-07684-s001.zip › ijerph-1763746-supplementary.pdf]

*Supplementary Table S1*

*Group comparisons among the study measures between EMDR (n = 15) and Control (12) samples assessed pre-intervention and post-intervention.*

| Variable                                                          | Control - Pre | EMDR - Pre   | <i>p</i> | Control - Post | EMDR - Post  | <i>p</i> |
|-------------------------------------------------------------------|---------------|--------------|----------|----------------|--------------|----------|
| 1. Autobiographical memory definition<br>(Autobiographical; n°/%) | 12 (100 %)    | 14 (93.33 %) | = 1      | 11 (91.67 %)   | 13 (86.67 %) | = 1      |
| 2. Integration level<br>(Non-Integrated; n°/%)                    | 12 (100 %)    | 15 (100 %)   | = 1      | 11 (91.67 %)   | 13 (86.67 %) | = 1      |

Note: *p* = *p*-value resulting from McNemar's Test for rows 1-2. 1. Autobiographical memory definition from the Coding System for Autobiographical Memory Narratives in Psychotherapy (CS-AMNP); 2. Integration level from the Classification System and Scoring Manual for Self-Defining Autobiographical Memories (CS-SM-SDAM). Frequency and percentage (in brackets) is shown for rows 1-2.

*Supplementary Table S2*

*Group comparisons among the study measures within EMDR (n = 15) and Control (12) samples assessed pre-intervention and post-intervention.*

| Variable                                                          | Control - Pre | Control - Post | <i>p</i> | EMDR - Pre   | EMDR - Post  | <i>p</i> |
|-------------------------------------------------------------------|---------------|----------------|----------|--------------|--------------|----------|
| 1. Autobiographical memory definition<br>(Autobiographical; n°/%) | 12 (100 %)    | 11 (91.67 %)   | = 0.617  | 14 (93.33 %) | 13 (86.67 %) | = 0.773  |
| 2. Integration level<br>(Non-Integrated; n°/%)                    | 12 (100 %)    | 11 (91.67 %)   | = 0.617  | 15 (100 %)   | 13 (86.67 %) | = 0.289  |

Note: *p* = *p*-value resulting from McNemar's Test with Yates correction for rows 1-2. 1. Autobiographical memory definition from the Coding System for Autobiographical Memory Narratives in Psychotherapy (CS-AMNP); 2. Integration level from the Classification System and Scoring Manual for Self-Defining Autobiographical Memories (CS-SM-SDAM). Frequency and percentage (in brackets) is shown for rows 1-2.

*Supplementary Table S3*

*GLM regression analyses predicting narrative complexity level, SUD and VoC score from the other interval scales for group EMDR sample post-intervention (n = 15).*

| Predictor                                    | $\beta$      | <i>t</i> | <i>p</i> |
|----------------------------------------------|--------------|----------|----------|
| <u>Criterion: Narrative complexity level</u> |              |          |          |
| <i>Adjusted R<sup>2</sup> = .175</i>         |              |          |          |
| VoC                                          | -.261(.429)  | -.609    | .554     |
| SUD                                          | -.0242(.127) | -.190    | .853     |
| <u>Criterion: VoC</u>                        |              |          |          |
| <i>Adjusted R<sup>2</sup> = .231</i>         |              |          |          |
| Narrative complexity                         | -.115(.189)  | -.609    | .554     |
| SUD                                          | -.134(.0751) | -1.781   | .1       |
| <u>Criterion: SUD</u>                        |              |          |          |
| <i>Adjusted R<sup>2</sup> = .21</i>          |              |          |          |
| Narrative complexity                         | -.124(.653)  | -.19     | .853     |
| VoC                                          | -1.562(.877) | -1.781   | .1       |

Note: Standard errors in parentheses; SUD = Subjective Unit of Distress; VoC = Validity of Cognition.
